# Supplementary material for: KIBRA repairs synaptic plasticity and promotes resilience to tauopathy-related memory loss
Source: PubMed Central journal article supplement (PMC10836803; doi:10.1172/jci169064), 2024-02-01

# Full unedited gels for Figure 1

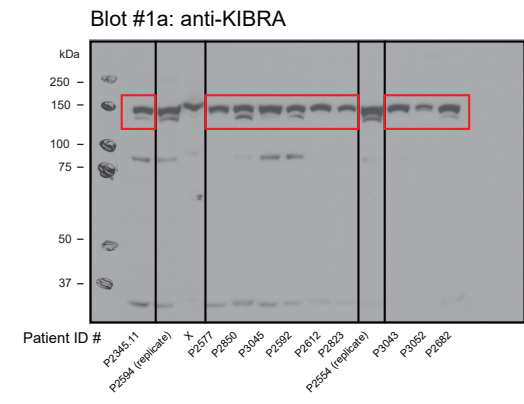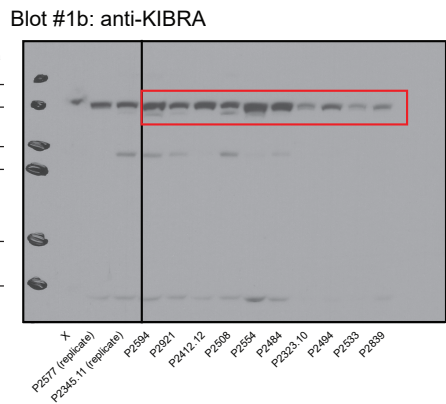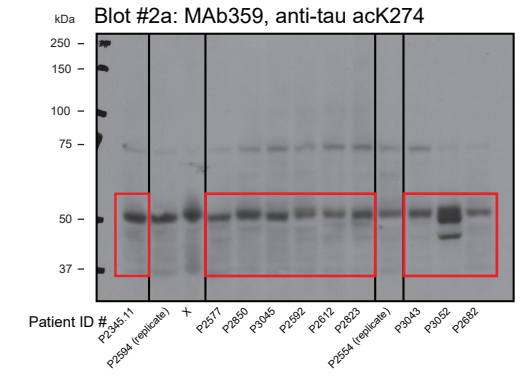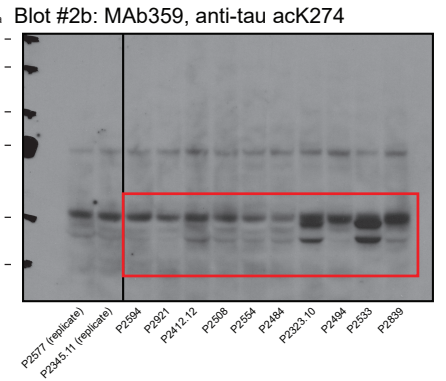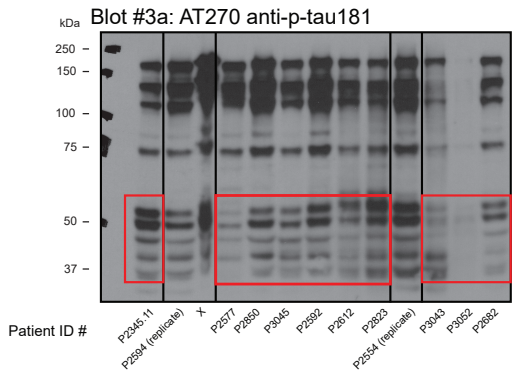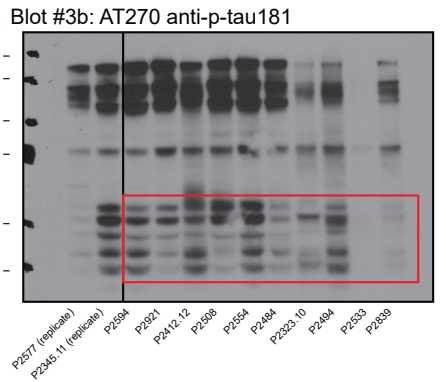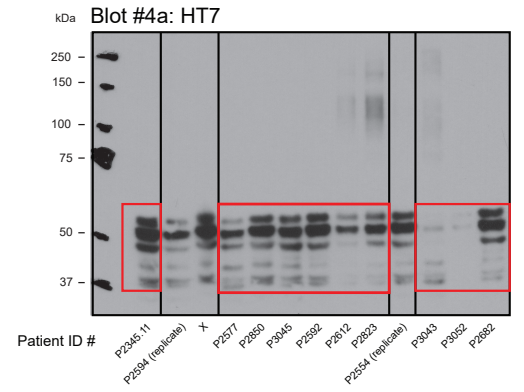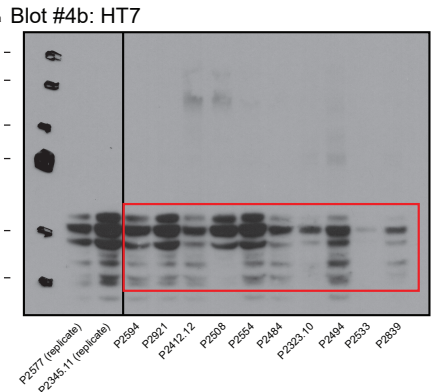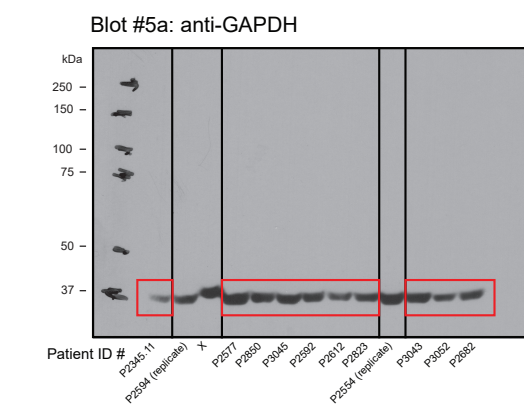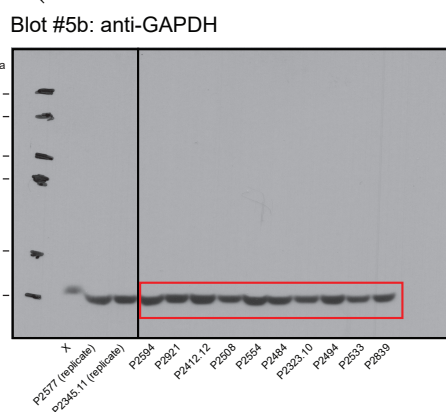

\* Sample X: homogenate from one extra control brain, run in duplicate, was excluded from analyses because it displayed distorted, uneven, and inconsistent bands by western blotting.

Full unedited gels for Figure 4

Blot #1: AT180

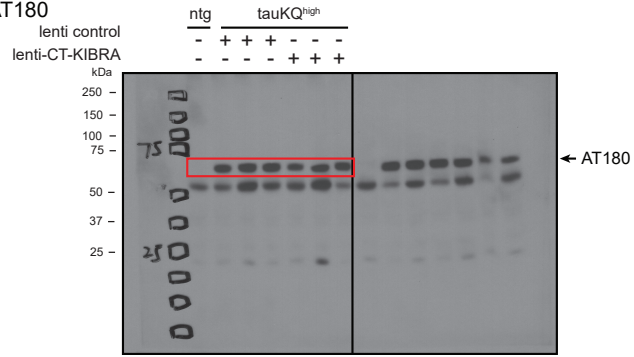

Blot #2: AT270

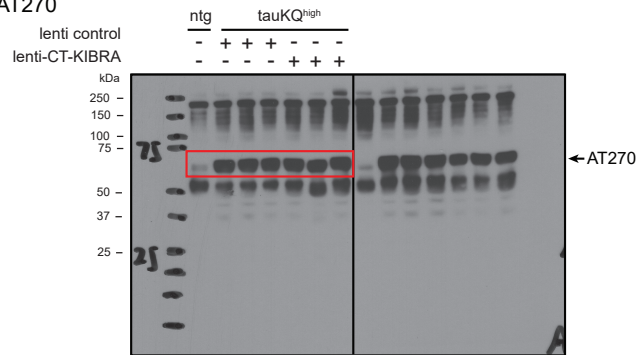

Blot #3: HT7

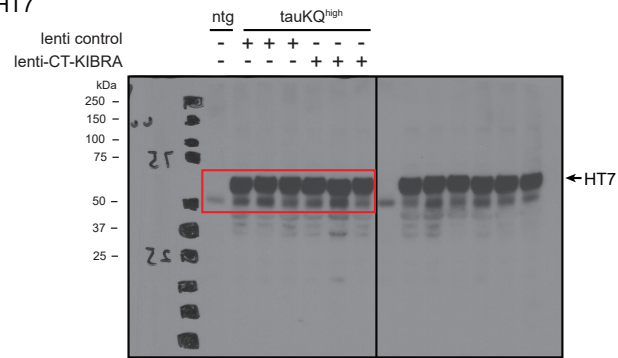

Blot #4: Tau5

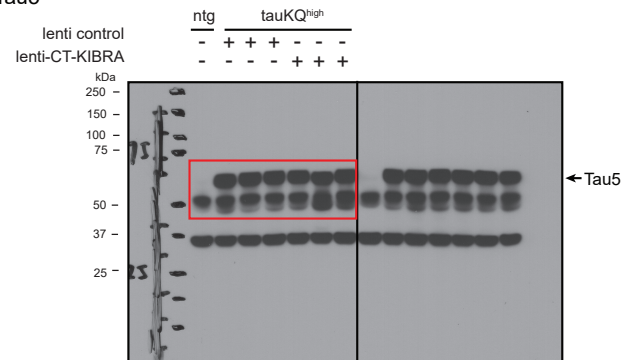

Blot #5: anti-GAPDH

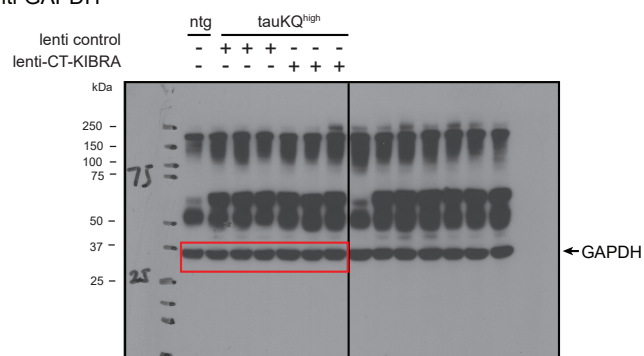



# Full unedited gels for Figure 5

## Blot #1: anti-PKM $\zeta$

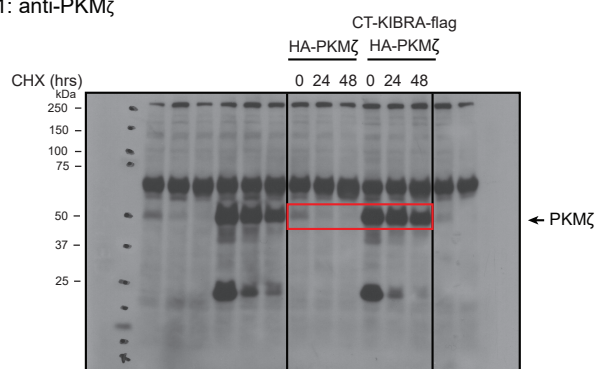

## Blot #2: anti-flag

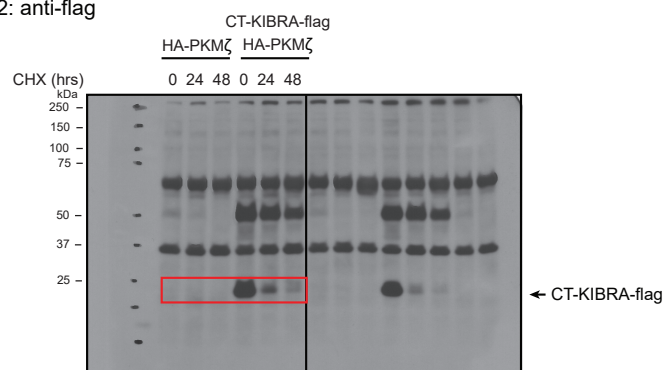

## Blot #3: anti-GAPDH

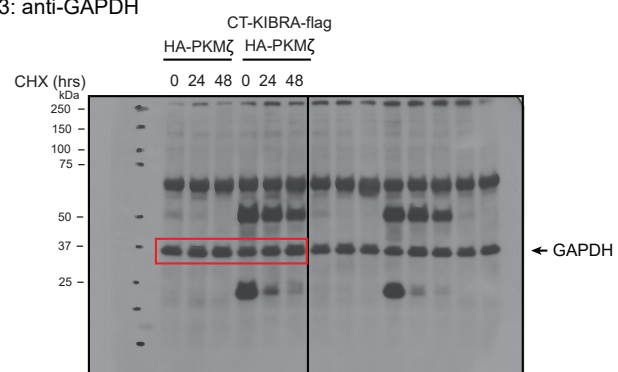

Full unedited gels for Figure 6

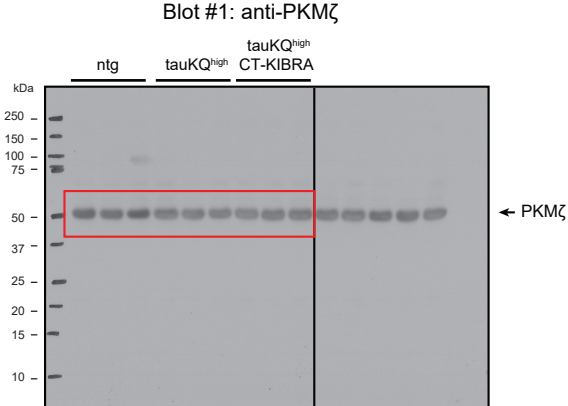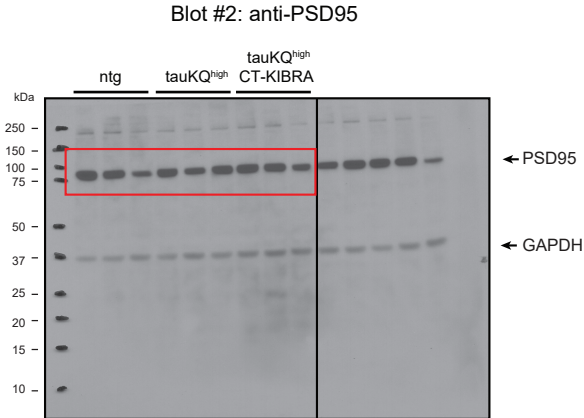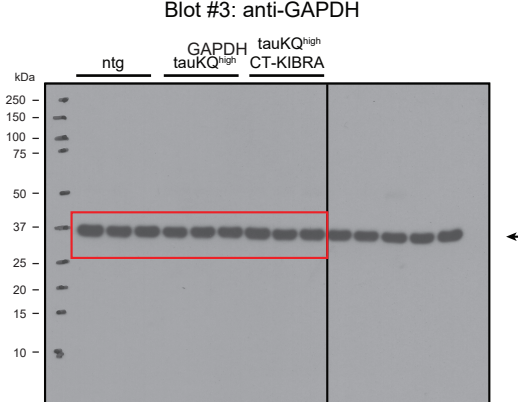

# Full unedited gels for Supplemental Figure 3

Blot #1: anti-GluA2/3

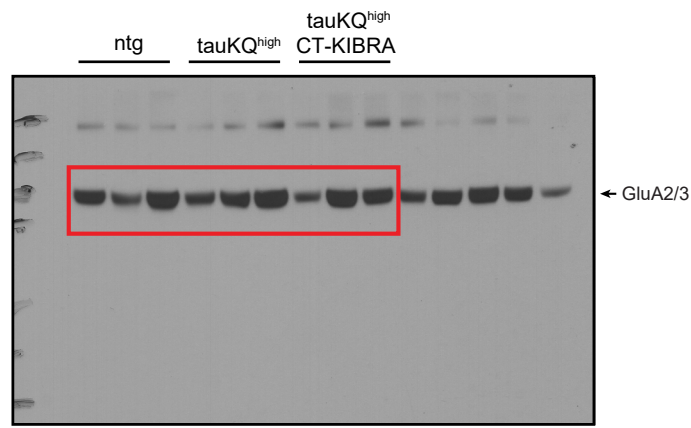

Blot #2: anti-Synaptotagmin-1

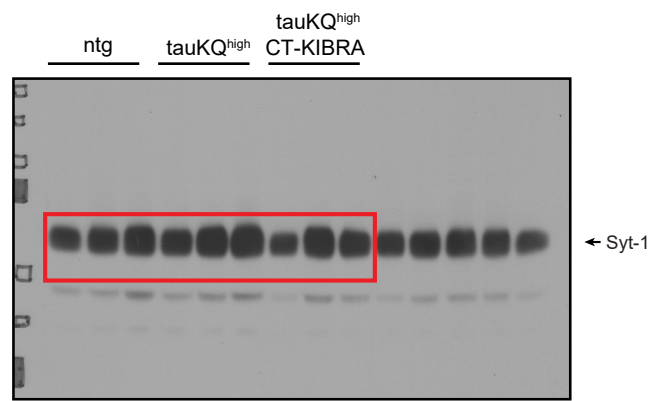

Blot #3: anti-GluN1

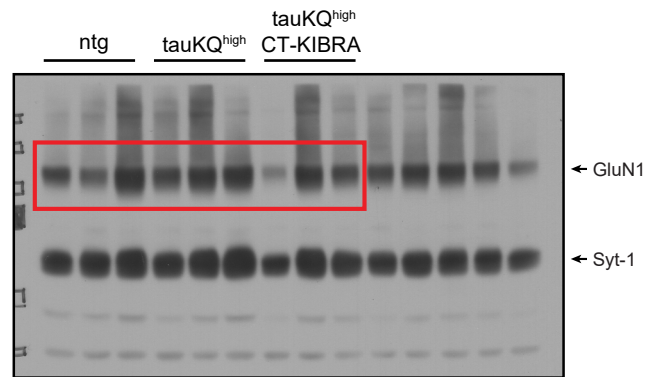

Blot #4: anti-GAPDH

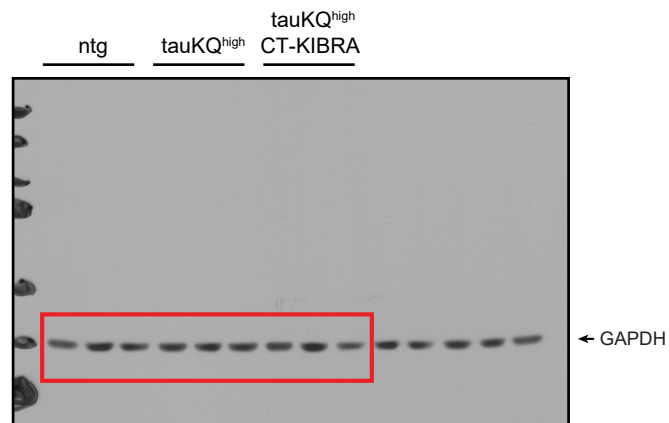

Full unedited gels for Supplemental Figure 5

Gel #1: PKM $\zeta$

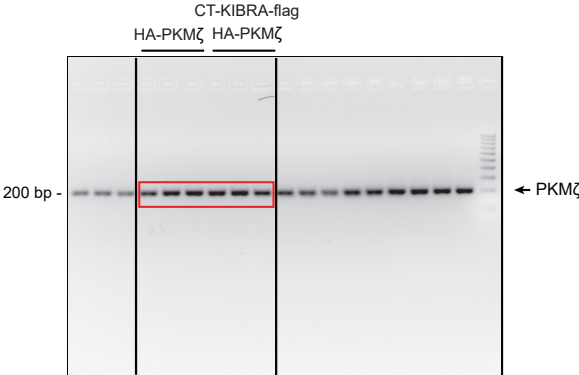

Gel #2: actin

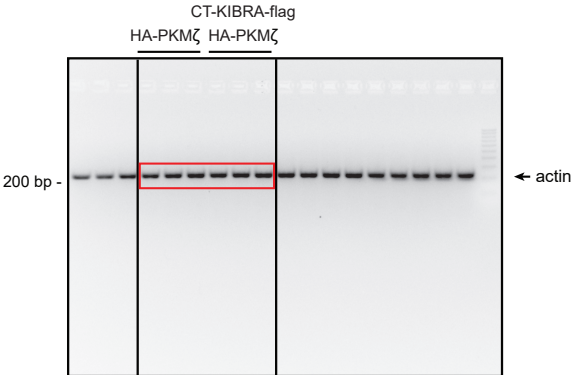



Full unedited gels for Supplemental Figure 6

A

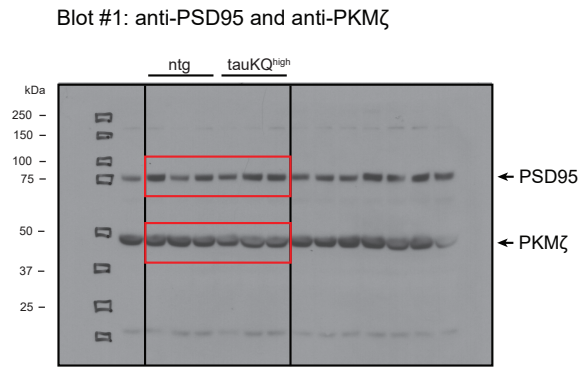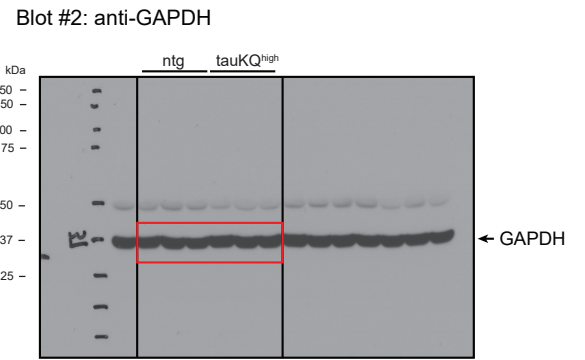

C

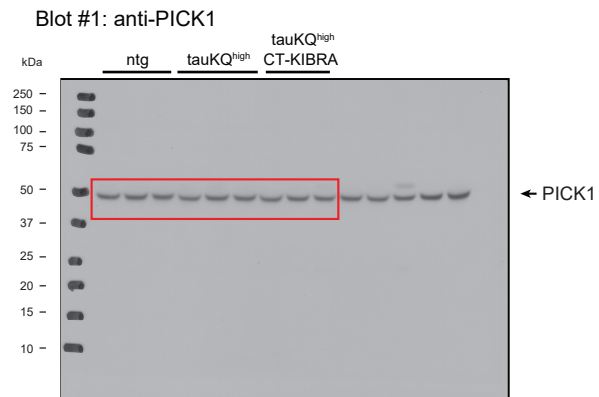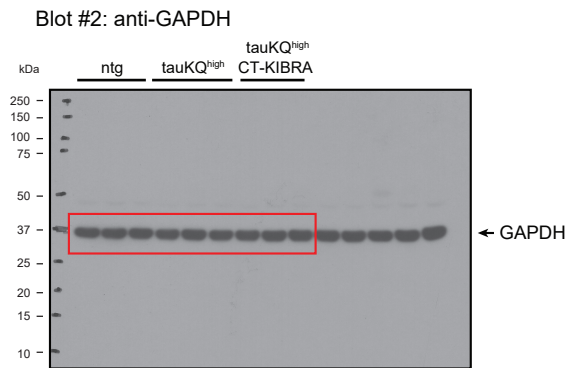

Supplement: jci-134-169064-s029.pdf [file jci-134-169064-s029.pdf]
